# Supplementary material
Source: Research Square preprint supplement (doi:10.21203/rs.3.rs-9950987/v1)
Supplement: Supplementary file 1 [file 5fdd4efdd3c8a6bb02752d5d.docx]

**Supplementary Table 1.** Stratified APGAR score

| **Apgar category** | **1-minute Apgar, n (%)** | **5-minute Apgar, n (%)** |
| --- | --- | --- |
| 0–3 | 211 (59.1%) | 62 (17.4%) |
| 4–6 | 107 (30.0%) | 111 (31.1%) |
| 7–10 | 39 (10.9%) | 184 (51.5%) |
